# Supplementary material
Source: PubMed Central journal article supplement (PMC8595845)
Supplement: NIHMS1747644-supplement-Supplemental_Publication_Material.pdf [file NIHMS1747644-supplement-Supplemental_Publication_Material.pdf]

## SUPPLEMENTAL MATERIAL

### Phenotypic expression, natural history and risk stratification of cardiomyopathy caused by *FLNC* truncating variants

Marta Gigli MD,\*<sup>1</sup> Davide Stolfo MD,\*<sup>1,2</sup> Sharon Graw PhD,<sup>3</sup> Marco Merlo MD,<sup>1</sup> Caterina Gregorio MS,<sup>4</sup> Suet Nee Chen PhD,<sup>3</sup> Matteo Dal Ferro MD,<sup>1</sup> Alessia Paldino<sup>1</sup>, Giulia De Angelis<sup>1</sup>, Francesca Brun MD,<sup>1</sup> Jean Jirikowic MS CGC,<sup>3</sup> Ernesto E. Salcedo MD,<sup>3</sup> Sylvia Turja RN,<sup>3</sup> Diane Fatkin MD,<sup>5,6</sup> Renee Johnson PhD,<sup>5</sup> J. Peter van Tintelen MD PhD,<sup>7,8</sup> Anneline S.J.M. Te Riele MD PhD,<sup>7,8</sup> Arthur Wilde MD PhD,<sup>9</sup> Neal K. Lakdawala MD,<sup>10</sup> Kermshlise Picard MPH,<sup>10</sup> Daniela Miani MD,<sup>11</sup> Daniele Muser MD,<sup>11</sup> Giovanni Maria Severini PhD,<sup>12</sup> Hugh Calkins MD,<sup>13</sup> Cynthia A. James PhD, CGC,<sup>13</sup> Brittney Murray MS CGC,<sup>13</sup> Crystal Tichnell, RN, MGC,<sup>13</sup> Victoria N. Parikh MD PhD,<sup>14</sup> Euan A. Ashley MD PhD,<sup>14</sup> Chloe Reuter MS LCGC,<sup>14</sup> Jiangping Song MD,<sup>15</sup> Daniel Judge MD,<sup>16</sup> William J McKenna, MD DSc,<sup>17</sup> Matthew RG Taylor MD PhD,<sup>3</sup> Gianfranco Sinagra MD FESC,<sup>1</sup> Luisa Mestroni MD FACC FAHA<sup>3</sup>

\* These coauthors equally contributed as first author

First authors: Gigli, Stolfo

#### Short title: Outcome of FLNCTv Cardiomyopathy

<sup>1</sup> Cardiothoracovascular Department, Azienda Sanitaria-Universitaria Giuliano Isontina (ASUGI), Trieste, Italy

<sup>2</sup> Division of Cardiology, Department of Medicine, Karolinska Institutet, Stockholm, Sweden

<sup>3</sup> Cardiovascular Institute and Adult Medical Genetics Program, University of Colorado Anschutz Medical Campus, Aurora, CO, USA

<sup>4</sup> Biostatistics Unit, Department of Medical Sciences, University of Trieste, Trieste, Italy

<sup>5</sup> Molecular Cardiology Division, Victor Chang Cardiac Research Institute, Sydney, Australia  
St Vincent's Clinical School, Faculty of Medicine, UNSW Sydney, Sydney, Australia

<sup>6</sup> Cardiology Department, St Vincent's Hospital, Sydney, Australia

<sup>7</sup> Division of Medicine, Department of Genetics and Cardiology, University Medical Center, Utrecht, the Netherlands

<sup>8</sup> Netherlands Heart Institute, Utrecht, the Netherlands

<sup>9</sup> Heart Centre, Department of Clinical and Experimental Cardiology, Amsterdam UMC, University of Amsterdam, Amsterdam, the Netherlands

<sup>10</sup> Brigham and Women's Hospital, Harvard Medical School, Boston, MA USA

<sup>11</sup> University Hospital of Udine, Udine, Italy

<sup>12</sup> Institute for Maternal and Child Health, IRCCS Burlo Garofolo, Trieste, Italy

<sup>13</sup> Division of Cardiology, Department of Medicine, Johns Hopkins University, Baltimore, MD USA

<sup>14</sup> Stanford Center for Inherited Cardiovascular Disease, Stanford, CA USA

<sup>15</sup> National Center for Cardiovascular Diseases in Beijing, Beijing, China

<sup>16</sup> Medical University of South Carolina, Charleston, SC USA

<sup>17</sup> Institute of Cardiovascular Science, University College of London, London, United Kingdom

#### Corresponding authors:

Luisa Mestroni, MD

Molecular Genetics, Cardiovascular Institute

University of Colorado Denver Anschutz Medical Campus

12700 E 19th Ave # F442

Aurora, Colorado 80045-2507 (USA)

Phone: [\(303\)724-0577](tel:3037240577)

Matthew R.G. Taylor, MD, PhD  
Adult Medical Genetics Program, Department of Medicine  
University of Colorado Denver Anschutz Medical Campus  
12700 E 19th Ave # F442  
Aurora, Colorado 80045-2507 (USA)  
Phone: (303)-724-1400. Email: [Matthew.Taylor@cuanschutz.edu](mailto:Matthew.Taylor@cuanschutz.edu)

**Supplemental Table I. List and classification of FLNctv included in the study**

|    | Enrollment Center        | ID                  | Nucleotide Change  | Protein Change   | ACMG Variant Classification <sup>12</sup> | GnomAD MAF <sup>‡</sup> | FLNC Domain      | Additional Variants Gene | Nucleotide Change | Protein Change | Reference of previous publication |
|----|--------------------------|---------------------|--------------------|------------------|-------------------------------------------|-------------------------|------------------|--------------------------|-------------------|----------------|-----------------------------------|
| 1  | FCR/U. Trieste Hospital  | TSFDC-MDF-MoMa      | c.451G>T           | p.Glu151*        | P <sup>§</sup>                            | Absent                  | ABD <sup>#</sup> |                          |                   |                |                                   |
| 2  | U. Amsterdam Hospital    | A03                 | c.697C>T           | p.Gln233*        | P/LP**                                    | Absent                  | ABD              | PPA2                     | c.514G>A;p        | Glu172Lys      | 18                                |
| 3  | U. Amsterdam Hospital    | A04                 | c.697C>T           | p.Gln233*        | P/LP                                      | Absent                  | ABD              |                          |                   |                | 18                                |
| 4  | U. Amsterdam Hospital    | A05                 | c.697C>T           | p.Gln233*        | P/LP                                      | Absent                  | ABD              |                          |                   |                | 18                                |
| 5  | U. Amsterdam Hospital    | A06                 | c.697C>T           | p.Gln233*        | P/LP                                      | Absent                  | ABD              |                          |                   |                | 18                                |
| 6  | FCR/U. Trieste Hospital  | TSSDC130-02-2302    | c.805C>T           | p.Arg269*        | P                                         | Absent                  | ROD1             |                          |                   |                | 7                                 |
| 7  | FCR/U. Colorado Hospital | DNFDC249-0001-MRGT1 | c.964G>T           | p.Glu322*        | LP                                        | Absent                  | ROD1             |                          |                   |                |                                   |
| 8  | Victor Chang Institute   | VCCRI PF-IV-1       | c.970-4A>G         | Intronic splice  | LP <sup>††</sup>                          | 0.000143                | ROD1             |                          |                   |                |                                   |
| 9  | Harvard U. Hospital      | WSUS219309          | c.1444C>T          | p.Arg482*        | P                                         | Absent                  | ROD1             |                          |                   |                |                                   |
| 10 | Harvard U. Hospital      | OYIM213618          | c.1444C>T          | p.Arg482*        | P                                         | Absent                  | ROD1             |                          |                   |                |                                   |
| 11 | Harvard U. Hospital      | OYIR222900          | c.1444C>T          | p.Arg482*        | P                                         | Absent                  | ROD1             |                          |                   |                |                                   |
| 12 | Amsterdam U. Hospital    | A01                 | c.1466_1473delinsA | p.Val489Glyfs*33 | LP                                        | Absent                  | ROD1             |                          |                   |                | 18                                |
| 13 | Amsterdam U. Hospital    | A02                 | c.1466_1473delinsA | p.Val489Glyfs*33 | LP                                        | Absent                  | ROD1             |                          |                   |                | 18                                |
| 14 | Stanford U. Hospital     | STE1                | c.1605C>A          | p.Cys535*        | LP                                        | Absent                  | ROD1             |                          |                   |                |                                   |
| 15 | FCR/U. Colorado Hospital | DNFDC079 02-1517    | c.2119C>T          | p.Gln707*        | LP                                        | Absent                  | ROD1             |                          |                   |                | 7                                 |
| 16 | U. Trieste Hospital      | TSFDC-MDF2-WBAT     | c.2190AC>A         | p.Tyr730*        | LP                                        | Absent                  | ROD1             |                          |                   |                |                                   |
| 17 | Fuwai Hospital           | Fuwai-1             | c.2618delA         | p.Glu873fs       | LP                                        | Absent                  | ROD1             |                          |                   |                |                                   |
| 18 | FCR/U. Colorado Hospital | DNFDC195- 10-003CVI | c.2930-1G>T        | splice           | P                                         | Absent                  | ROD1             |                          |                   |                | 7                                 |
| 19 | FCR/U. Trieste Hospital  | TSFDC038-02-0225    | c.3791-1G>A        | splice           | P/LP                                      | Absent                  | ROD1             |                          |                   |                | 7                                 |

|    |                          |                    |                         |                   |      |            |      |     |                   |                   |  |    |
|----|--------------------------|--------------------|-------------------------|-------------------|------|------------|------|-----|-------------------|-------------------|--|----|
| 20 | FCR/U. Trieste Hospital  | TSFDC038- MDF3-VGP | c.3791-1G>A             | splice            | P/LP | Absent     | ROD1 |     |                   |                   |  | 7  |
| 21 | FCR/U. Trieste Hospital  | TSFDC038- MDF4-SC  | c.3791-1G>A             | splice            | P/LP | Absent     | ROD1 |     |                   |                   |  |    |
| 22 | FCR/U. Trieste Hospital  | TSFDC038-01-0748   | c.3791-1G>A             | splice            | P/LP | Absent     | ROD1 |     |                   |                   |  |    |
| 23 | FCR/U. Trieste Hospital  | TSFDC038-MDF5-SR   | c.3791-1G>A             | splice            | P/LP | Absent     | ROD1 |     |                   |                   |  |    |
| 24 | FCR/U. Trieste Hospital  | TSFDC-MDF6-SMV     | c.3791-1G>A             | splice            | P/LP | Absent     | ROD1 |     |                   |                   |  |    |
| 25 | FCR/U. Trieste Hospital  | TSFDC7-MDF7-BrC    | c.3791-1G>A             | splice            | P/LP | Absent     | ROD1 |     |                   |                   |  |    |
| 26 | FCR/U. Trieste Hospital  | TSFDC043- 02-0215  | c.3791-1G>A             | splice            | P/LP | Absent     | ROD1 |     |                   |                   |  | 7  |
| 27 | Harvard U. Hospital      | AMVE221656         | c.3791-1G>C             | splice            | LP   | 0.00001396 | ROD1 |     |                   |                   |  |    |
| 28 | Harvard U. Hospital      | CSER222507         | c.3791-1G>C             | splice            | LP   | 0.00001396 | ROD1 |     |                   |                   |  |    |
| 29 | Harvard U. Hospital      | ELYL222127         | c.3791-1G>C             | splice            | LP   | 0.00001396 | ROD1 |     |                   |                   |  |    |
| 30 | Harvard U. Hospital      | ELLA222701         | c.3791-1G>C             | splice            | LP   | 0.00001396 | ROD1 |     |                   |                   |  |    |
| 31 | Victor Chang Institute   | VCCRI R-IV-1       | c.3791-8G>A             | Intronic splice   | LP‡‡ | 0.0001217  | ROD1 | TTN | c.76115_76116insA | p.Asn25372Lysfs*5 |  | 30 |
| 32 | Victor Chang Institute   | VCCRI R-III-10     | c.3791-8G>A             | Intronic splice   | LP‡‡ | 0.0001217  | ROD1 |     |                   |                   |  | 30 |
| 33 | Utrecht U. Hospital      | U01                | c.3838dup               | p.Leu1280fs       | LP   | Absent     | ROD1 |     |                   |                   |  |    |
| 34 | U. Trieste Hospital      | TSFDC-MDF8-SaA     | c.4108C>T               | p.Arg1370*        | P    | Absent     | ROD1 |     |                   |                   |  |    |
| 35 | FCR/U. Colorado Hospital | DNFDC-MRGT2        | c.4275dup               | p.Arg1426Alafs*85 | LP   | Absent     | ROD1 |     |                   |                   |  |    |
| 36 | Stanford U. Hospital     | STB1               | c.4716delG              | p.Leu1573Cysfs*34 | LP   | Absent     | ROD1 |     |                   |                   |  |    |
| 37 | Stanford U. Hospital     | STB2               | c.4716delG              | p.Leu1573Cysfs*34 | LP   | Absent     | ROD1 |     |                   |                   |  |    |
| 38 | Johns Hopkins Hospital   | JHH2               | c.4737+5G>A             | Intronic splice   | LP   | Absent     | ROD1 |     |                   |                   |  |    |
| 39 | Johns Hopkins Hospital   | JHH3               | c.4737+5G>A             | Intronic splice   | LP   | Absent     | ROD1 |     |                   |                   |  |    |
| 40 | Victor Chang Institute   | VCCRI G*-III-1     | c.4926_4927insACGTCA CA | p.Val1643Thrfs*26 | P    | 0.00001397 | ROD1 |     |                   |                   |  |    |
| 41 | Victor Chang Institute   | VCCRI G*-III-2     | c.4926_4927insACGTCA CA | p.Val1643Thrfs*26 | P    | 0.00001397 | ROD1 |     |                   |                   |  |    |
| 42 | Victor Chang Institute   | VCCRI G*-III-7     | c.4926_4927insACGTCA CA | p.Val1643Thrfs*26 | P    | 0.00001397 | ROD1 |     |                   |                   |  |    |
| 43 | Victor Chang Institute   | VCCRI G*-II-1      | c.4926_4927insACGTCA CA | p.Val1643Thrfs*26 | P    | 0.00001397 | ROD1 |     |                   |                   |  |    |
| 44 | Victor Chang Institute   | VCCRI G*-III-3     | c.4926_4927insACGTCA CA | p.Val1643Thrfs*26 | P    | 0.00001397 | ROD1 |     |                   |                   |  |    |

|        |                             |                        |                            |                          |    |            |        |  |  |  |     |
|--------|-----------------------------|------------------------|----------------------------|--------------------------|----|------------|--------|--|--|--|-----|
| 4<br>5 | Harvard U.<br>Hospital      | OHAM222367             | c.4926_4927insACGTCA<br>CA | p.Val1643Thrfs*26        | P  | 0.00001397 | ROD1   |  |  |  |     |
| 4<br>6 | FCR/U.Colora<br>do Hospital | DNFDC057-04-0536       | c.5672_5672delG            | p.Gly1891Valfs*62        | P  | Absent     | ROD2   |  |  |  | 7,8 |
| 4<br>7 | FCR/U.Colora<br>do Hospital | DNFDC057-18-023CV1     | c.5672_5672delG            | p.Gly1891Valfs*62        | P  | Absent     | ROD2   |  |  |  | 7,8 |
| 4<br>8 | FCR/U.Colora<br>do Hospital | DNFDC057-19-004CV1     | c.5672_5672delG            | p.Gly1891Valfs*62        | P  | Absent     | ROD2   |  |  |  | 7,8 |
| 4<br>9 | FCR/U.Colora<br>do Hospital | DNFDC057-01-0987       | c.5672_5672delG            | p.Gly1891Valfs*62        | P  | Absent     | ROD2   |  |  |  | 7,8 |
| 5<br>0 | U.Trieste<br>Hospital       | TSFDC-MDF8-GaSa        | c.5842+2T>A                | splice                   | P  | Absent     | ROD2   |  |  |  |     |
| 5<br>1 | U.Trieste<br>Hospital       | TSFDC-MDF9-GaSi        | c.5842+2T>A                | splice                   | P  | Absent     | ROD2   |  |  |  |     |
| 5<br>2 | FCR/U. Trieste<br>Hospital  | TSFDC-MDF10-ArGi       | c.5866C>T                  | p.Gln1956*               | LP | Absent     | ROD2   |  |  |  |     |
| 5<br>3 | FCR/U. Trieste<br>Hospital  | TSFDC-MDF11-PaGi       | c.6136_6137insG            | p.Val2046Glyfs*34        | P  | Absent     | Z-Line |  |  |  |     |
| 5<br>4 | FCR/U. Trieste<br>Hospital  | TSFDC-MDF12-PaSa       | c.6136_6137insG            | p.Val2046Glyfs*34        | P  | Absent     | Z-Line |  |  |  | 7   |
| 5<br>5 | FCR/U. Trieste<br>Hospital  | TSFDC-MDF13-PaSt       | c.6136_6137insG            | p.Val2046Glyfs*34        | P  | Absent     | Z-Line |  |  |  |     |
| 5<br>6 | FCR/U. Trieste<br>Hospital  | TSFDC-MDF14-CPF        | c.6136_6137insG            | p.Val2046Glyfs*34        | P  | Absent     | Z-Line |  |  |  |     |
| 5<br>7 | FCR/U. Trieste<br>Hospital  | TSFDC-MDF15-BaGi       | c.6208G>A                  | p.Gly2070Ser             | LP | Absent     | Z-Line |  |  |  |     |
| 5<br>8 | FCR/U. Trieste<br>Hospital  | TSFDC-MDF16-BaVi       | c.6208G>A                  | p.Gly2070Ser             | LP | Absent     | Z-Line |  |  |  |     |
| 5<br>9 | FCR/U. Trieste<br>Hospital  | TSFDC-MDF17-BaDi       | c.6208G>A                  | p.Gly2070Ser             | LP | Absent     | Z-Line |  |  |  | 7   |
| 6<br>0 | FCR/U. Trieste<br>Hospital  | TSFDC-MDF18-NaSa       | c.6240_6259del             | p.Pro2081Leufs*2         | LP | Absent     | Z-Line |  |  |  |     |
| 6<br>1 | FCR/U. Trieste<br>Hospital  | TSFDC-MDF19-NaLu       | c.6240_6259del             | p.Pro2081Leufs*2         | LP | Absent     | Z-Line |  |  |  |     |
| 6<br>2 | FCR/U. Trieste<br>Hospital  | TSFDC20-MDF20-<br>BeDa | c.6240_6259del             | p.Pro2081Leufs*2         | LP | Absent     | Z-Line |  |  |  |     |
| 6<br>3 | Utrecht U.<br>Hospital      | U02                    | c.6255_6256del             | p.Asp2085fs              | LP | Absent     | Z-Line |  |  |  |     |
| 6<br>4 | FCR/U. Trieste<br>Hospital  | TSFDC-MDF21-CeNi       | c.6459_6460del             | p.Thr2153fs              | LP | Absent     | Z-Line |  |  |  | 7   |
| 6<br>5 | FCR/U. Trieste<br>Hospital  | TSRVD029-02-1070       | c.6565G>T                  | p.Glu2189*               | LP | Absent     | Z-Line |  |  |  | 9   |
| 6<br>6 | FCR/U. Trieste<br>Hospital  | TSRVD029-BaRO          | c.6565G>T                  | p.Glu2189*               | LP | Absent     | Z-Line |  |  |  | 9   |
| 6<br>7 | Utrecht U.<br>Hospital      | U03                    | c.6614_6622del             | p.Val2205_Val2207<br>del | LP | Absent     | Z-Line |  |  |  |     |
| 6<br>8 | Utrecht U.<br>Hospital      | U04                    | c.6614_6622del             | p.Val2205_Val2207<br>del | LP | Absent     | Z-Line |  |  |  |     |
| 6<br>9 | FCR/U. Trieste<br>Hospital  | TSFDC-MDF22-CrGi       | c.6891_6901                | p.Pro2298fs              | LP | Absent     | Z-Line |  |  |  |     |
| 7<br>0 | FCR/U. Trieste<br>Hospital  | TSFDC-MDF23-Bu Da      | c.6976C>T                  | p.Arg2326*               | P  | Absent     | ROD2   |  |  |  | 7   |

|    |                         |                  |             |                   |    |            |              |  |  |  |     |
|----|-------------------------|------------------|-------------|-------------------|----|------------|--------------|--|--|--|-----|
| 71 | Victor Chang Institute  | VCCRI DF-III-1   | c.7107C>A   | p.Cys2369*        | LP | Absent     | ROD2         |  |  |  | 30  |
| 72 | Victor Chang Institute  | VCCRI DF-IV-2    | c.7107C>A   | p.Cys2369*        | LP | Absent     | ROD2         |  |  |  | 30  |
| 73 | Victor Chang Institute  | VCCRI DF-III-4   | c.7107C>A   | p.Cys2369*        | LP | Absent     | ROD2         |  |  |  | 30  |
| 74 | Victor Chang Institute  | VCCRI DF-III-2   | c.7107C>A   | p.Cys2369*        | LP | Absent     | ROD2         |  |  |  | 30  |
| 75 | Victor Chang Institute  | VCCRI DF-III-5   | c.7107C>A   | p.Cys2369*        | LP | Absent     | ROD2         |  |  |  | 30  |
| 76 | FCR/U. Trieste Hospital | TSFDC031-438     | c.7251+1A>G | p.Tyr2381Glyfs    | P  | Absent     | ROD2         |  |  |  | 7,8 |
| 77 | FCR/U. Trieste Hospital | TSFDC031-322     | c.7251+1A>G | p.Tyr2381Glyfs    | P  | Absent     | ROD2         |  |  |  | 7,8 |
| 78 | FCR/U. Udine Hospital   | TSFDC029-414     | c.7251+1A>G | p.Tyr2381Glyfs    | P  | Absent     | ROD2         |  |  |  | 7,8 |
| 79 | FCR/U. Udine Hospital   | TSFDC029-408     | c.7251+1A>G | p.Tyr2381Glyfs    | P  | Absent     | ROD2         |  |  |  | 7,8 |
| 80 | FCR/U. Udine Hospital   | TSFDC029-409     | c.7251+1A>G | p.Tyr2381Glyfs    | P  | Absent     | ROD2         |  |  |  | 7,8 |
| 81 | FCR/U. Udine Hospital   | TSFDC029-410     | c.7251+1A>G | p.Tyr2381Glyfs    | P  | Absent     | ROD2         |  |  |  | 7,8 |
| 82 | U. Trieste Hospital     | TSFDC-MDF24-GaMa | c.7252-2A>G | Splice            | LP | Absent     | ROD2         |  |  |  |     |
| 83 | FCR/U. Trieste Hospital | TSFDC25-SuGu     | c.8107delG  | p.Asp2703Thrfs*69 | LP | 0.00003197 | Dimerization |  |  |  |     |
| 84 | FCR/U. Trieste Hospital | TSFDC-MDF26-SuSa | c.8107delG  | p.Asp2703Thrfs*69 | LP | 0.00003197 | Dimerization |  |  |  | 7   |
| 85 | Johns Hopkins Hospital  | JHH 1            | c.8107delG  | p.Asp2703Thrfs*69 | LP | 0.00003197 | Dimerization |  |  |  | 9   |

**Legend.** ‡gnomAD v3.0 (<https://gnomad.broadinstitute.org>). §P: pathogenic variant, LP: likely pathogenic variant. LP<sup>††</sup>: based on functional assay, cosegregation, bioinformatic algorithm predicting abnormal splicing and truncated protein; LP<sup>‡\*</sup>: based on bioinformatic algorithm predicting abnormal splicing and truncated protein, and cosegregation. Variant location based on UNIPROT (<https://www.uniprot.org/uniprot/Q14315>). For references, see the reference list in the main text.

**Supplemental Table II. Phenotype presentation according to variant location (global p-value=0.128)**

|                               | <b>DCM</b> | <b>ARVC</b> | <b>ALVC</b> | <b>Biventricular<br/>ARVC</b> | <b>Minor<br/>phenotypic<br/>expression</b> | <b>Healthy</b> |
|-------------------------------|------------|-------------|-------------|-------------------------------|--------------------------------------------|----------------|
| <b>ABD (n;%)</b>              | 6 (100%)   | 0           | 0           | 0                             | 0                                          | 0              |
| <b>ROD 1 (n;%)</b>            | 17 (44%)   | 0           | 12 (31%)    | 0                             | 5 (13%)                                    | 5 (13%)        |
| <b>ROD 2 (n;%)</b>            | 18 (49%)   | 2 (5%)      | 8 (22%)     | 1 (3%)                        | 5 (14%)                                    | 3 (8%)         |
| <b>Dimerization<br/>(n;%)</b> | 1 (33%)    | 1 (33%)     | 1 (33%)     | 0                             | 0                                          | 0              |
|                               |            |             |             |                               |                                            |                |
| <b>Z-line (n;%)</b>           | 8 (61%)    | 0           | 1 (8%)      | 1 (8%)                        | 2 (15%)                                    | 1 (8%)         |
| <b>No Z-line (n;%)</b>        | 34 (47%)   | 3 (4%)      | 20 (28%)    | 0                             | 8 (11%)                                    | 7 (10%)        |

*For abbreviations see table 1 in the main text and table S2.*

Supplemental Figure I

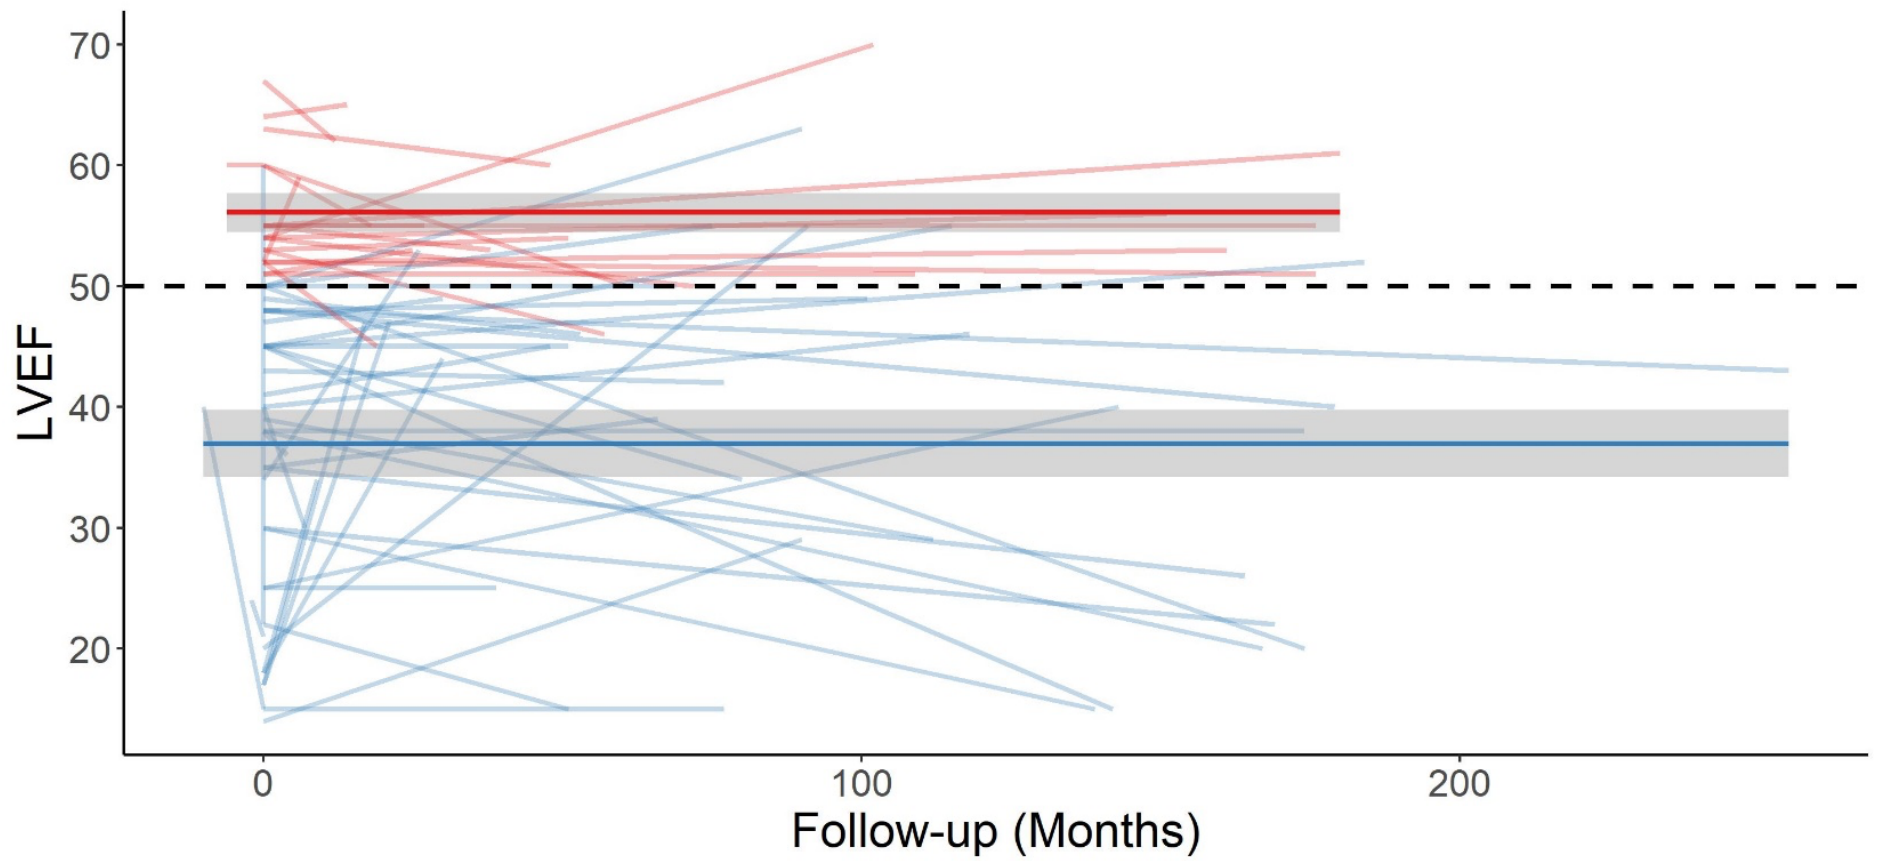



# Supplemental Figure II

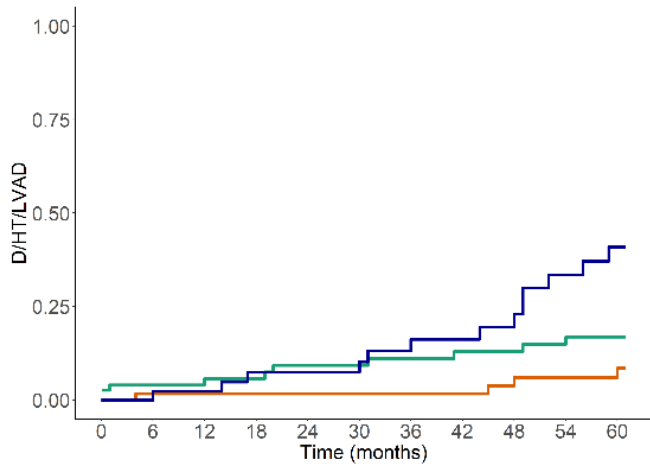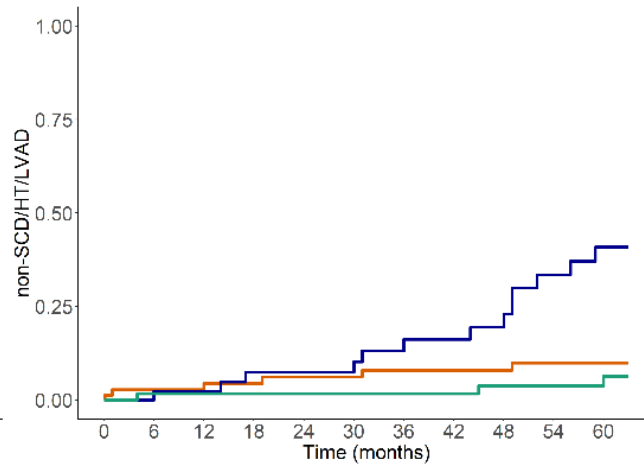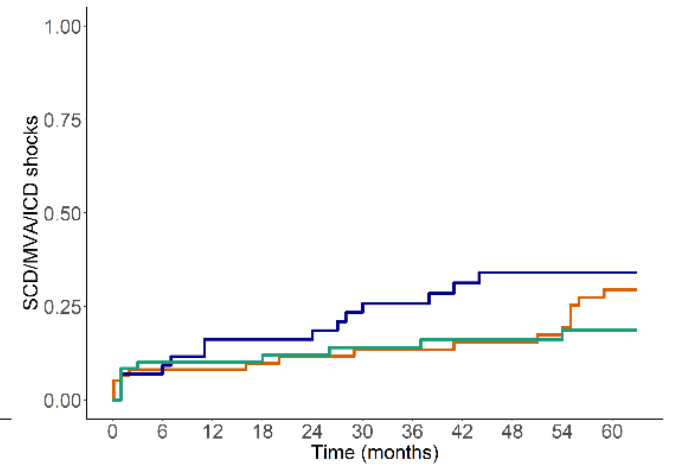

Number at risk

| Gene | 0  | 6  | 12 | 18 | 24 | 30 | 36 | 42 | 48 | 54 | 60 |
|------|----|----|----|----|----|----|----|----|----|----|----|
| LMNA | 43 | 42 | 39 | 36 | 36 | 33 | 28 | 26 | 23 | 19 | 16 |
| DSP  | 60 | 58 | 55 | 53 | 52 | 48 | 48 | 45 | 44 | 38 | 38 |
| FLNC | 76 | 62 | 58 | 53 | 51 | 50 | 48 | 46 | 45 | 43 | 40 |

Cumulative Incidence Function

| Gene | 0 | 6    | 12   | 18   | 24   | 30   | 36   | 42   | 48   | 54   | 60   |
|------|---|------|------|------|------|------|------|------|------|------|------|
| LMNA | 0 | 0.02 | 0.02 | 0.07 | 0.07 | 0.1  | 0.16 | 0.16 | 0.23 | 0.33 | 0.41 |
| DSP  | 0 | 0.03 | 0.04 | 0.04 | 0.06 | 0.06 | 0.08 | 0.08 | 0.08 | 0.1  | 0.1  |
| FLNC | 0 | 0.02 | 0.02 | 0.02 | 0.02 | 0.02 | 0.02 | 0.02 | 0.04 | 0.04 | 0.06 |

Cumulative Incidence Function

| Gene | 0 | 6    | 12   | 18   | 24   | 30   | 36   | 42   | 48   | 54   | 60   |
|------|---|------|------|------|------|------|------|------|------|------|------|
| LMNA | 0 | 0.09 | 0.16 | 0.16 | 0.19 | 0.26 | 0.26 | 0.31 | 0.34 | 0.34 | 0.34 |
| DSP  | 0 | 0.08 | 0.08 | 0.1  | 0.12 | 0.13 | 0.13 | 0.15 | 0.15 | 0.19 | 0.3  |
| FLNC | 0 | 0.1  | 0.1  | 0.12 | 0.12 | 0.14 | 0.14 | 0.16 | 0.16 | 0.19 | 0.19 |

Gene — FLNC — DSP — LMNA

## Figures Legend

**Supplemental Figure I. Trends of LVEF for FLNCtv carriers with available echocardiographic follow-up reassessment.** Dashed line indicates the LVEF<50% threshold. Red lines indicate carriers with preserved LVEF at baseline, blue lines indicate carriers with reduced LVEF at baseline. Bold lines represent mean trends during follow-up. Grey shadow is 95% CI.

**Supplemental Figure II. Comparison of outcome between the study population of FLNCtv affected carriers (n=76), LMNA affected carriers (n=43) and DSP affected carriers (n=60).** Left panel: all-cause mortality/heart transplantation/left ventricular assist device (D/HT/LVAD) in FLNCtv (green lines) vs LMNA mutation (blue lines) vs DSP mutation (red lines). Central panel: Cumulative Incidence Function (CIF) of non-arrhythmic death/HT/LVAD in FLNCtv vs LMNA mutation vs DSP mutation. Right panel: CIF of sudden cardiac death/major ventricular arrhythmias (SCD/MVA) in FLNCtv vs LMNA mutation vs DSP mutation. In FLNCtv patients the risk of D/HT/LVAD was lower compared to LMNA patients (p=0.007) patients and similar to DSP carriers (0.665), the risk of non-SCD/HT/LVAD for FLNCtv patients was lower compared to LMNA patients (p=0.003) patients and similar to DSP patients (0.773) and the risk of SCD/MVA was comparable to LMNA patients (0.258) and DSP patients (p=0.258).
